# Supplementary material for: Potential for Lager Beer Production from Saccharomyces cerevisiae Strains Isolated from the Vineyard Environment
Source: MDPI journal article supplement (doi:10.3390/pr9091628), 2021-09-09
Supplement: s1 [file s1]

| Days | CSB21B                  | CS1C                    | 41CM                    | CS2C                    | W-34/70                 |
|------|-------------------------|-------------------------|-------------------------|-------------------------|-------------------------|
| 0    | 55.00±0.10 <sup>a</sup> | 55.01±0.10 <sup>a</sup> | 55.02±0.15 <sup>a</sup> | 55.05±0.17 <sup>a</sup> | 55.03±0.15 <sup>a</sup> |
| 1    | 52.91±0.33 <sup>a</sup> | 51.41±0.47 <sup>b</sup> | 50.98±0.20 <sup>b</sup> | 52.87±0.40 <sup>a</sup> | 53.48±2.78 <sup>a</sup> |
| 2    | 48.03±0.17 <sup>b</sup> | 47.25±0.21 <sup>b</sup> | 48.97±0.22 <sup>a</sup> | 47.97±0.17 <sup>b</sup> | 49.70±0.57 <sup>a</sup> |
| 3    | 43.01±0.29 <sup>b</sup> | 43.88±0.40 <sup>a</sup> | 40.03±0.35 <sup>c</sup> | 41.88±0.36 <sup>b</sup> | 44.94±0.29 <sup>a</sup> |
| 4    | 22.12±0.26 <sup>c</sup> | 29.08±0.18 <sup>a</sup> | 20.03±0.17 <sup>d</sup> | 27.96±0.20 <sup>a</sup> | 25.05±0.21 <sup>b</sup> |
| 7    | 11.92±0.11 <sup>a</sup> | 12.62±0.09 <sup>a</sup> | 11.12±0.12 <sup>b</sup> | 12.83±0.08 <sup>a</sup> | 12.30±0.11 <sup>a</sup> |
| 14   | 0.99±0.02 <sup>b</sup>  | 1.59±0.06 <sup>a</sup>  | 1.52±0.06 <sup>a</sup>  | 2.50±0.08 <sup>a</sup>  | 1.00±0.01 <sup>b</sup>  |

Table S3. . Maltose values during fermentation in MBW inoculated with *S. cerevisiae* CSB21B, CS1C, CS2C, 41CM and *S. pastorianus* W-34/70.
