# Supplementary material for: Potential for Lager Beer Production from Saccharomyces cerevisiae Strains Isolated from the Vineyard Environment
Source: MDPI journal article supplement (doi:10.3390/pr9091628), 2021-09-09
Supplement: s1 [file s1]

| Days | CSB21B                  | CS1C                    | 41CM                    | CS2C                    | W-34/70                 |
|------|-------------------------|-------------------------|-------------------------|-------------------------|-------------------------|
| 0    | 30.04±0.16 <sup>a</sup> | 29.90±0.17 <sup>a</sup> | 30.02±0.26 <sup>a</sup> | 30.00±0.12 <sup>a</sup> | 30.06±0.30 <sup>a</sup> |
| 1    | 22.10±0.76 <sup>d</sup> | 28.56±0.51 <sup>a</sup> | 26.30±1.07 <sup>b</sup> | 24.10±0.55 <sup>c</sup> | 24.93±0.60 <sup>c</sup> |
| 2    | 16.52±1.15 <sup>c</sup> | 18.05±0.74 <sup>b</sup> | 14.59±0.78 <sup>d</sup> | 19.92±0.55 <sup>a</sup> | 19.03±0.39 <sup>a</sup> |
| 3    | 11.33±0.80 <sup>c</sup> | 15.27±0.66 <sup>a</sup> | 11.76±0.45 <sup>c</sup> | 13.96±0.75 <sup>b</sup> | 11.90±0.72 <sup>c</sup> |
| 4    | 8.57±0.33 <sup>b</sup>  | 11.76±0.64 <sup>a</sup> | 8.76±0.15 <sup>b</sup>  | 11.23±0.70 <sup>a</sup> | 9.30±0.34 <sup>b</sup>  |
| 7    | 0.91±0.08 <sup>a</sup>  | 1.51±0.07 <sup>a</sup>  | 1.46±0.15 <sup>a</sup>  | 1.76±0.35 <sup>a</sup>  | 1.13±0.20 <sup>a</sup>  |

Table S4. Glucose values during fermentation in MBW inoculated with *S. cerevisiae* CSB21B, CS1C, CS2C, 41CM and *S. pastorianus* W-34/70.
