# Supplementary material for: Potential for Lager Beer Production from Saccharomyces cerevisiae Strains Isolated from the Vineyard Environment
Source: MDPI journal article supplement (doi:10.3390/pr9091628), 2021-09-09
Supplement: s1 [file s1]

| Days | CSB21B                 | CS1C                   | 41CM                   | CS2C                   | W-34/70                |
|------|------------------------|------------------------|------------------------|------------------------|------------------------|
| 1    | 0.15±0.03 <sup>a</sup> | 0.16±0.02 <sup>a</sup> | 0.38±0.03 <sup>a</sup> | 0.24±0.04 <sup>a</sup> | 0.24±0.03 <sup>a</sup> |
| 2    | 1.61±0.13 <sup>a</sup> | 0.88±0.05 <sup>b</sup> | 1.49±0.07 <sup>a</sup> | 1.06±0.12 <sup>b</sup> | 1.74±0.07 <sup>a</sup> |
| 3    | 2.28±0.13 <sup>a</sup> | 1.81±0.12 <sup>b</sup> | 2.37±0.16 <sup>a</sup> | 2.22±0.10 <sup>a</sup> | 2.21±0.10 <sup>a</sup> |
| 4    | 2.41±0.19 <sup>b</sup> | 2.28±0.12 <sup>b</sup> | 2.71±0.17 <sup>a</sup> | 2.51±0.16 <sup>a</sup> | 2.63±0.11 <sup>a</sup> |
| 7    | 2.80±0.12 <sup>b</sup> | 2.65±0.13 <sup>b</sup> | 3.07±0.10 <sup>a</sup> | 3.02±0.10 <sup>a</sup> | 2.99±0.10 <sup>a</sup> |
| 14   | 3.47±0.13 <sup>a</sup> | 3.29±0.14 <sup>a</sup> | 3.39±0.11 <sup>a</sup> | 3.12±0.10 <sup>a</sup> | 3.34±0.25 <sup>a</sup> |

Table S2. Ethanol production during fermentation in MBW by *S. cerevisiae* CSB21B, CS1C, CS2C, 41CM and *S. pastorianus* W-34/70
