# Supplementary material for: Potential for Lager Beer Production from Saccharomyces cerevisiae Strains Isolated from the Vineyard Environment
Source: MDPI journal article supplement (doi:10.3390/pr9091628), 2021-09-09
Supplement: s1 [file s1]

| Days | CSB21B                 | CS1C                   | 41CM                   | CS2C                   | W-34/70                |
|------|------------------------|------------------------|------------------------|------------------------|------------------------|
| 0    | 5.50±0.07 <sup>a</sup> | 5.51±0.10 <sup>a</sup> | 5.53±0.13 <sup>a</sup> | 5.52±0.11 <sup>a</sup> | 5.55±0.12 <sup>a</sup> |
| 1    | 5.20±0.09 <sup>a</sup> | 5.27±0.06 <sup>a</sup> | 5.18±0.10 <sup>a</sup> | 5.27±0.10 <sup>a</sup> | 5.36±0.12 <sup>a</sup> |
| 2    | 4.95±0.08 <sup>a</sup> | 5.00±0.11 <sup>a</sup> | 4.91±0.07 <sup>a</sup> | 4.98±0.09 <sup>a</sup> | 4.98±0.05 <sup>a</sup> |
| 3    | 4.61±0.06 <sup>a</sup> | 4.59±0.09 <sup>a</sup> | 4.61±0.07 <sup>a</sup> | 4.63±0.02 <sup>a</sup> | 4.69±0.09 <sup>a</sup> |
| 4    | 4.24±0.12 <sup>a</sup> | 4.32±0.16 <sup>a</sup> | 4.27±0.11 <sup>a</sup> | 4.32±0.10 <sup>a</sup> | 4.31±0.08 <sup>a</sup> |
| 7    | 3.87±0.12 <sup>a</sup> | 3.90±0.09 <sup>a</sup> | 3.81±0.12 <sup>a</sup> | 3.91±0.09 <sup>a</sup> | 3.95±0.09 <sup>a</sup> |
| 14   | 3.43±0.06 <sup>a</sup> | 3.42±0.10 <sup>a</sup> | 3.10±0.08 <sup>c</sup> | 3.50±0.06 <sup>a</sup> | 3.57±0.10 <sup>a</sup> |

Table S5. pH values during alcoholic fermentation in MBW inoculated with *S. cerevisiae* CSB21B, CS1C, CS2C, 41CM and *S. pastorianus* W-34/70
