# Supplementary material for: Potential for Lager Beer Production from Saccharomyces cerevisiae Strains Isolated from the Vineyard Environment
Source: MDPI journal article supplement (doi:10.3390/pr9091628), 2021-09-09
Supplement: s1 [file s1]

Table S1

| Time (min) | Flocculation % |          |          |          |          |
|------------|----------------|----------|----------|----------|----------|
|            | CSB21B         | CS1C     | 41CM     | CS2C     | W-34/70  |
| 10         | 24.0±1.7       | 3.0±0.8  | 15.1±1.6 | 7.8±0.8  | 9.5±0.2  |
| 30         | 51.9±4.4       | 58.7±1.5 | 30.3±2.1 | 51.3±3.5 | 51.6±1.8 |
